# Supplementary material for: The stepwise organization of nanoparticles into a Pickering emulsion
Source: Royal Society of Chemistry journal article supplement (doi:10.1039/d0sm02028a), 2020-12-09
Supplement: d0sm02028a1.pdf [file d0sm02028a1.pdf]

# Supporting Information

## Stepwise Organization of Nanoparticle toward Pickering Emulsion

Jingjing Xu,<sup>ab</sup> Wei Xu,<sup>ab</sup> Dayin Sun,<sup>c</sup> Haihua Xiao<sup>ab</sup> and Zhenzhong Yang<sup>\*abc</sup>

<sup>a</sup> State Key Laboratory of Polymer Physics and Chemistry, Institute of Chemistry, Chinese Academy of Sciences, Beijing 100190, China

<sup>b</sup> University of Chinese Academy of Sciences, Beijing 100049, China

<sup>c</sup> Institute of Polymer Science and Engineering, Department of Chemical Engineering, Tsinghua University, Beijing 100084, China

### Calculation of degree of polymerization (DP).

Molecular weight of VSt is 158, while St is 104. DP of PVSt<sub>4.4k</sub> is calculated 28. DPs of PS in the samples of PVSt<sub>4.4k</sub>-*b*-PS<sub>29.7k</sub>, PVSt<sub>4.4k</sub>-*b*-PS<sub>7.7k</sub> and PVSt<sub>4.4k</sub>-*b*-PS<sub>5.6k</sub> are calculated 286, 74 and 54, respectively.

### Calculation of grafting number of the polymer chain on PVSt-*b*-PS@Fe<sub>3</sub>O<sub>4</sub> composite NPs.

The weight ratio of polymer to the amine-capped Fe<sub>3</sub>O<sub>4</sub> NP in one composite NP is

$$\frac{V_0 - V}{V\bar{M}_n} = kN$$

given as:

where  $V_0$ : the saturation magnetization of the amine-capped Fe<sub>3</sub>O<sub>4</sub> NP;  $V$ : the saturation magnetization of the composite NP;  $\bar{M}_n$ : the number average molecular weight of the grafting polymer chain;  $k$ : a constant;  $N$ : grafting number.

Based on the number average molecular weight of the grafting polymer (**Figure 1a**) and VSM results (**Figure 2d and Figure S2**), the grafting number ratio is calculated as

$N_1:N_2:N_3=1:4:10$  by using PVSt<sub>4.4k</sub>-*b*-PS<sub>29.7k</sub>, PVSt<sub>4.4k</sub>-*b*-PS<sub>7.7k</sub> and PVSt<sub>4.4k</sub>-*b*-PS<sub>5.6k</sub>.

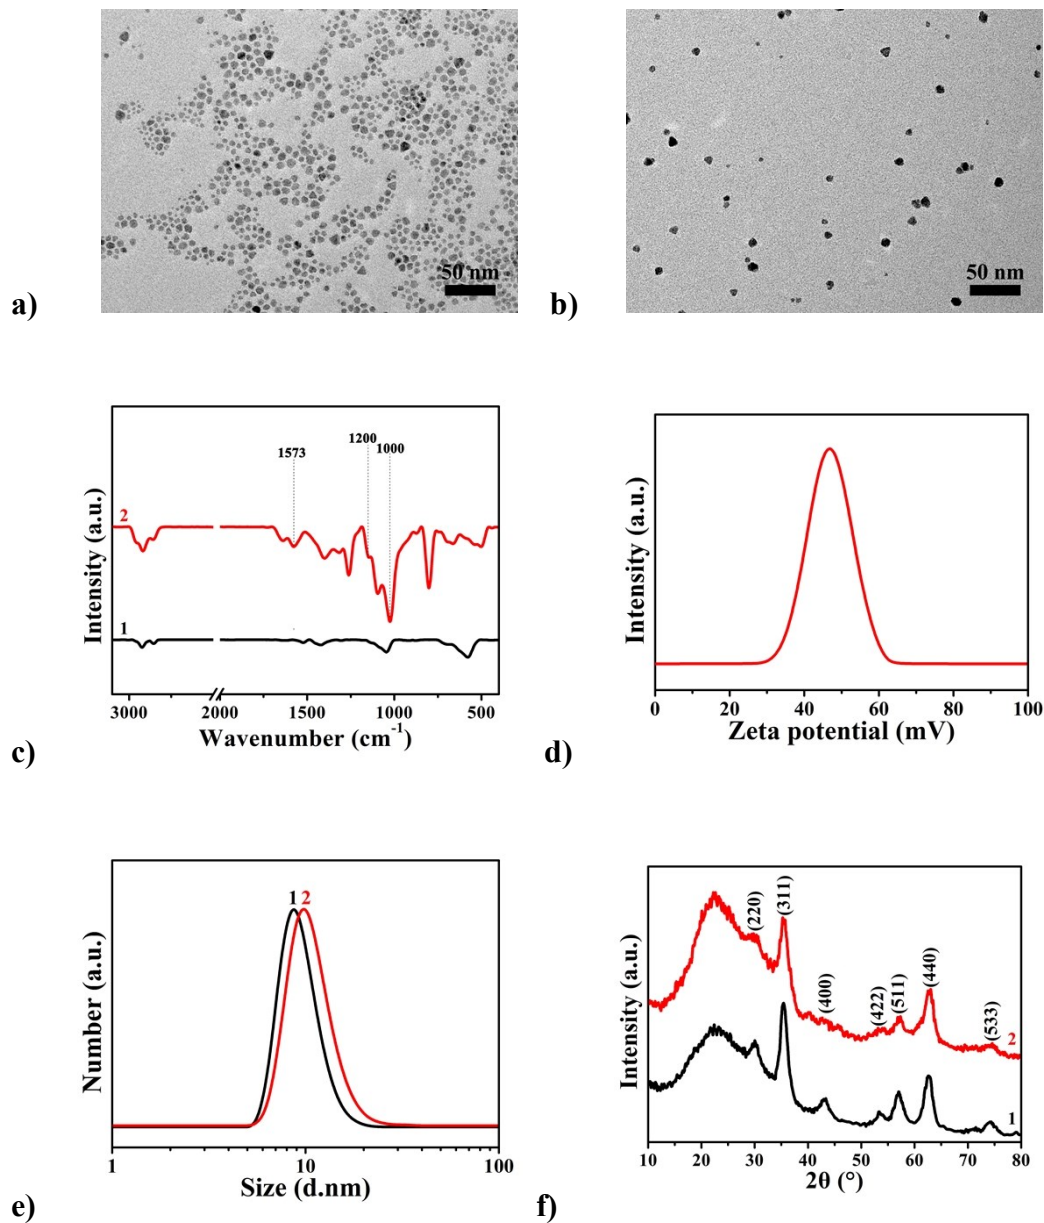

**Figure S1.** TEM images of (a) the oleic acid capped Fe<sub>3</sub>O<sub>4</sub> NP and (b) the amine-capped Fe<sub>3</sub>O<sub>4</sub> NP; (c) FT-IR spectra of (1) the oleic acid capped Fe<sub>3</sub>O<sub>4</sub> NP and (2) the amine-capped Fe<sub>3</sub>O<sub>4</sub> NP; (d) Zeta potential of the amine-capped Fe<sub>3</sub>O<sub>4</sub> NP in water; (e) DLS traces of (1) the oleic acid capped Fe<sub>3</sub>O<sub>4</sub> NP in toluene and (2) the amine-capped Fe<sub>3</sub>O<sub>4</sub> NP in water; (f) XRD patterns of (1) the oleic acid capped Fe<sub>3</sub>O<sub>4</sub> NP and (2) the amine-capped Fe<sub>3</sub>O<sub>4</sub> NP.

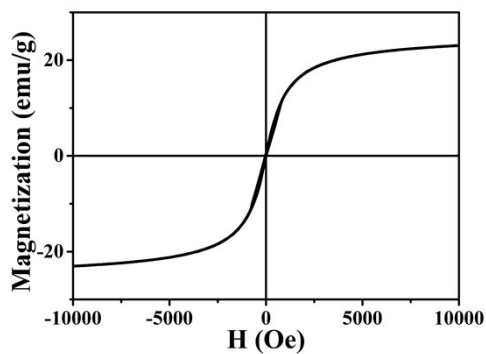

**Figure S2.** VSM curve of the amine-capped  $\text{Fe}_3\text{O}_4$  NP.

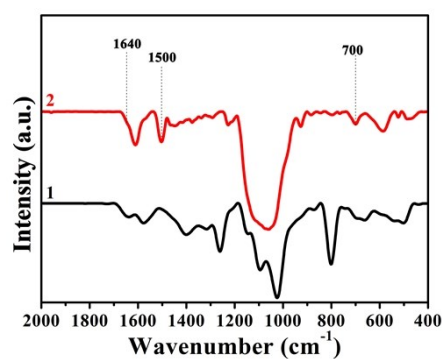

**Figure S3.** FT-IR spectra of (1) the amine-capped  $\text{Fe}_3\text{O}_4$  NP and (2) the PVSt-*b*-PS@ $\text{Fe}_3\text{O}_4$  composite NP.

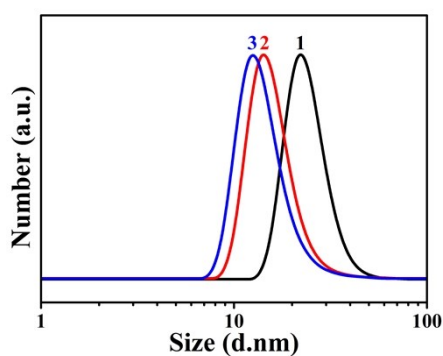

**Figure S4.** DLS traces of the three composite NPs after grafting varied polymers: (1) PVSt<sub>4.4k</sub>-*b*-PS<sub>29.7k</sub>, (2) PVSt<sub>4.4k</sub>-*b*-PS<sub>7.7k</sub> and (3) PVSt<sub>4.4k</sub>-*b*-PS<sub>5.6k</sub>. The measurement was performed in dimethyl sulfoxide (DMSO).

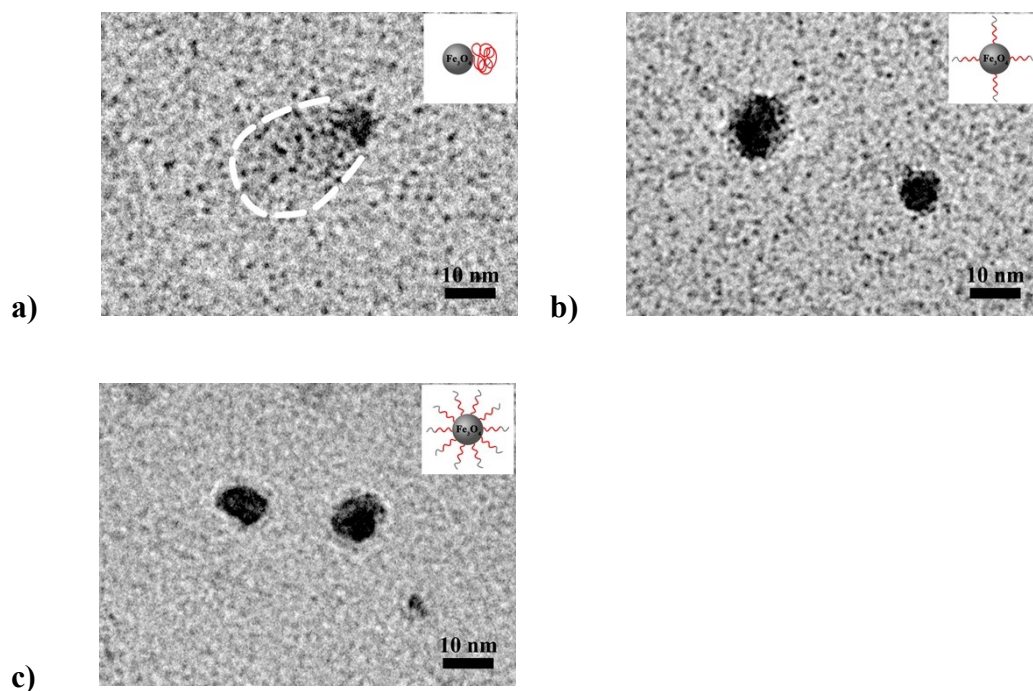

**Figure S5.** Magnified TEM images of the three representative PVSt-*b*-PS@Fe<sub>3</sub>O<sub>4</sub> composite NPs after conjugating with different polymers: (a) PVSt<sub>4.4k</sub>-*b*-PS<sub>29.7k</sub>, (b) PVSt<sub>4.4k</sub>-*b*-PS<sub>7.7k</sub>, and (c) PVSt<sub>4.4k</sub>-*b*-PS<sub>5.6k</sub>, the samples were stained with RuO<sub>4</sub>.

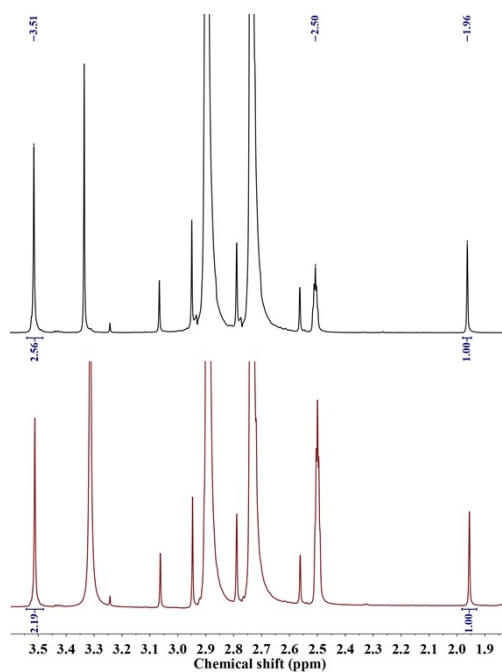

**Figure S6.** <sup>1</sup>H-NMR (DMSO-d<sub>6</sub>, 400MHz) spectra of the serum after removal of the PVSt<sub>4.4k</sub>-*b*-PS<sub>5.6k</sub>@Fe<sub>3</sub>O<sub>4</sub> composite NP from the dispersion in DMF (a) before and (b) after click reaction with mPEG-SH (10 mg). N, N-dimethylacetamide (DMA) was

added as the internal standard to monitor the conversion of mPEG-SH.

The intense characteristic peak at  $\delta=1.96$  ppm is assigned to the methyl proton of DMA as the internal standard.

The intense characteristic peak at  $\delta= 3.51$  ppm is assigned to the methylene proton of mPEG-SH.

For one composite NP of PVSt<sub>4.4k</sub>-*b*-PS<sub>5.6k</sub>@Fe<sub>3</sub>O<sub>4</sub>, the masses of Fe<sub>3</sub>O<sub>4</sub> NP and PVSt segment are estimated as:

$$m_{\text{Fe}_3\text{O}_4} = \rho V = \rho \frac{4}{3} \pi r^3 = 5.18 \times 4/3 \times 3.14 \times (5 \times 10^{-7})^3 = 2.71 \times 10^{-18} \text{ g.}$$

$$m_{\text{PS-}b\text{-PVSt}} = N M_n / N_A = 10 \times 10 \times 10^3 / (6.02 \times 10^{23}) = 1.66 \times 10^{-19} \text{ g.}$$

$$m_{\text{PVSt}} = N M_{n\text{PVSt}} / N_A = 10 \times 4.4 \times 10^3 / (6.02 \times 10^{23}) = 7.31 \times 10^{-20} \text{ g}$$

The PVSt mass fraction in respect to the composite NP is calculated:  $7.31 \times 10^{-20} / (2.71 \times 10^{-18} + 1.66 \times 10^{-19}) = 2.54\%$ .

Molar amount of VSt in 30 mg of the PVSt<sub>4.4k</sub>-*b*-PS<sub>5.6k</sub>-Fe<sub>3</sub>O<sub>4</sub> composite NP is calculated:  $30 \times 2.54\% / 158 = 4.82 \times 10^{-3}$  mmol.

NMR peak at 3.51 ppm is decreased by 14.5% after the click reaction, equal to the conversion of mPEG-SH. Molar amount of the reacted mPEG-SH is calculated:

$$10 \times 14.5\% / 1000 = 1.45 \times 10^{-3} \text{ mmol.}$$

The grafting ratio of mPEG-SH is measured  $1.45 \times 10^{-3} / 4.82 \times 10^{-3} = 30.1\%$ .

Number of the grafted mPEG-SH side chain onto one PVSt<sub>4.4k</sub>-*b*-PS<sub>5.6k</sub> chain is calculated:  $4400 / 158 \times 30.1\% \approx 8$ .

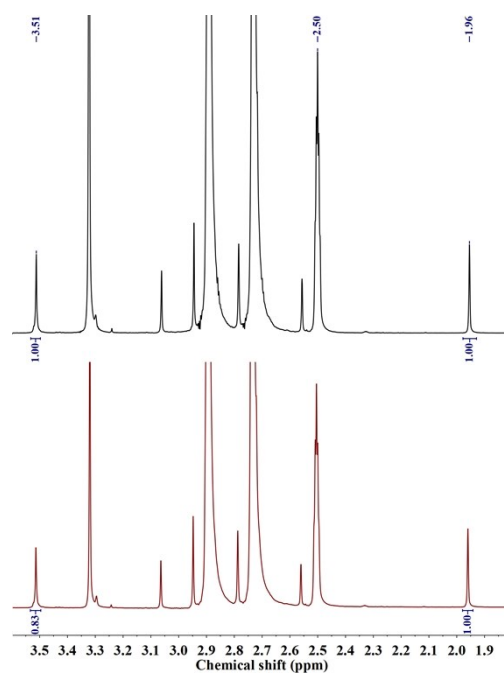

**Figure S7.**  $^1\text{H-NMR}$  (DMSO- $d_6$ , 400MHz) spectra of the serum after removal of the PVSt $_{4.4k}$ - $b$ -PS $_{5.6k}$ @Fe $_3$ O $_4$  composite NP from the dispersion in DMF (a) before and (b) after click reaction with mPEG-SH (4 mg). N, N-dimethylacetamide (DMA) was added as the internal standard to monitor the conversion of mPEG-SH.

NMR peak at 3.51ppm is decreased by 17% after the click reaction, equal to the conversion of mPEG-SH. Molar amount of the reacted mPEG-SH is calculated:

$$4 \times 17\% / 1000 = 0.68 \times 10^{-3} \text{ mmol.}$$

The grafting ratio of mPEG-SH is measured  $0.68 \times 10^{-3} / 4.82 \times 10^{-3} = 14.1\%$ .

Number of the grafted mPEG-SH side chain onto one PVSt $_{4.4k}$ - $b$ -PS $_{5.6k}$  chain is calculated:  $4400 / 158 \times 14.1\% \approx 4$ .

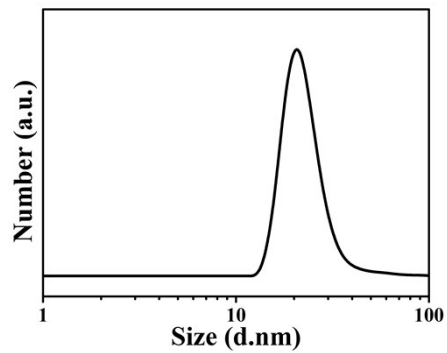

**Figure S8.** DLS trace of the dispersion as shown in Figure 3a1.

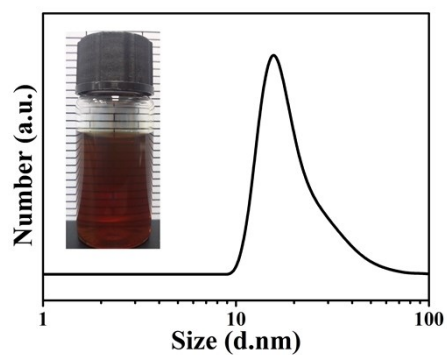

**Figure S9.** DLS trace of the oil/water mixture containing 1.5  $\mu\text{L}$  of cyclohexane.

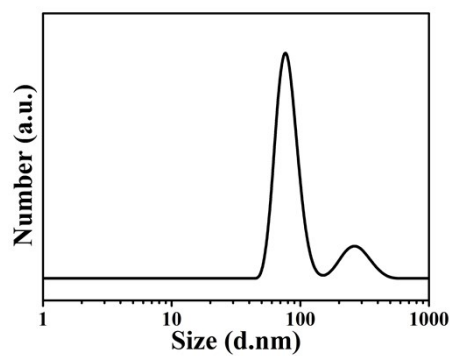

**Figure S10.** DLS trace of the dispersion as shown in Figure 3a2.

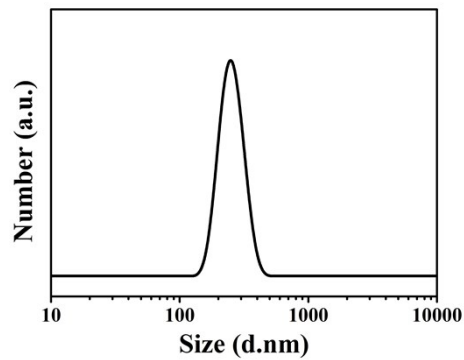

**Figure S11.** DLS trace of the oil/water mixture containing 12.0  $\mu\text{L}$  of cyclohexane.

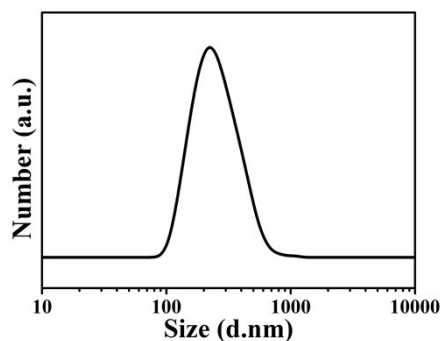

**Figure S12.** DLS trace of the bottom dispersion as shown in Figure 3a3.

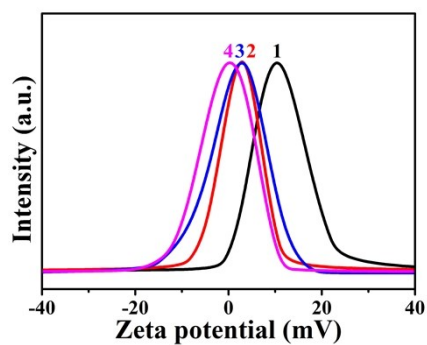

**Figure S13.** Zeta potential values of (1) the  $(\text{PVSt}_{4.4\text{k}}\text{-g-PEG}_8)\text{-b-PS}_{5.6\text{k}}\text{@Fe}_3\text{O}_4$  composite NP dispersion in water; (2-4) the dispersions as shown in Figures 3a1, 3a2 and 3a4, respectively.



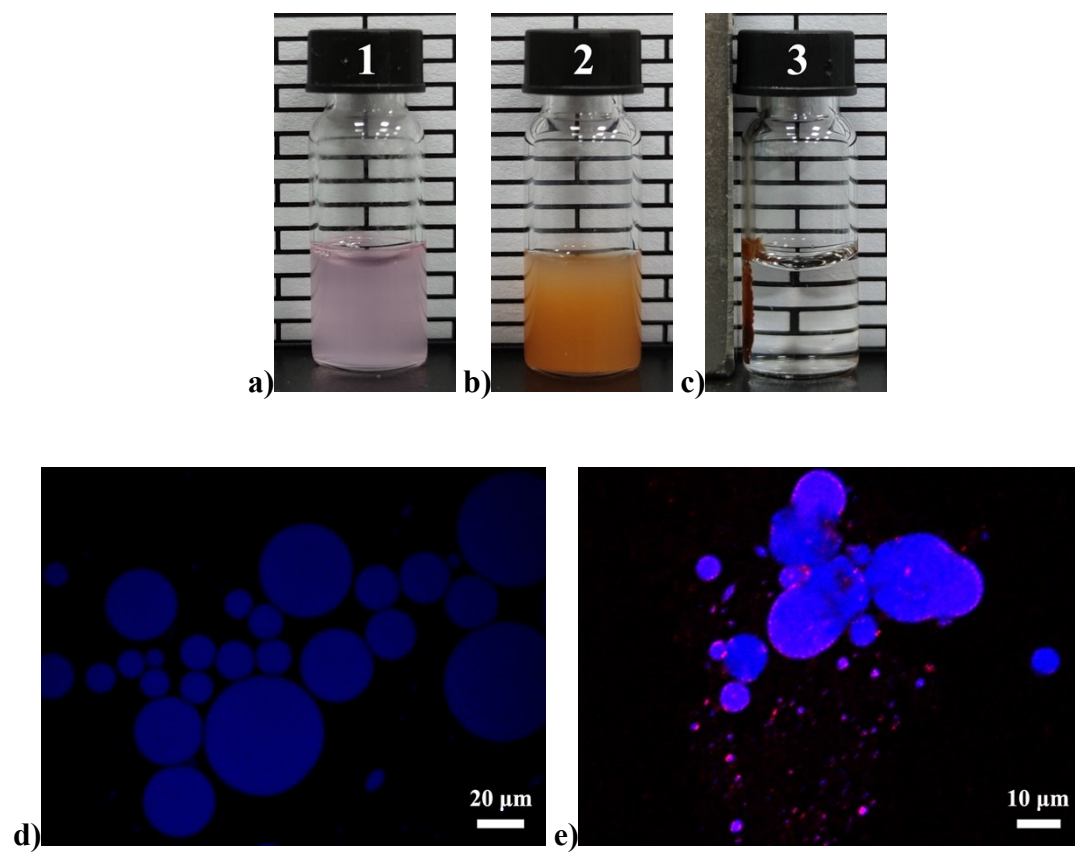

**Figure S14.** Magnetic collection of the emulsion stabilized with SDS: (a) the emulsion and (b) after feeding the composite NP; (c) magnetic collection of the emulsion; (d) CLSM image of the emulsion (a); (e) CLSM image of the emulsion (b).
